# Supplementary material for: Amphiphilic Polypeptides Obtained by Post-Polymerization Modification of Poly-l-Lysine as Systems for Combined Delivery of Paclitaxel and siRNA
Source: MDPI journal article supplement (doi:10.3390/pharmaceutics15041308), 2023-04-21
Supplement: s1 [file s1]

Supplementary Materials

# Amphiphilic Polypeptides Obtained by Post-Polymerization Modification of Poly-L-Lysine as Systems for Combined Delivery of Paclitaxel and siRNA

Apollinariia Dzhuzha <sup>1,2</sup>, Erik Gandalipov <sup>3</sup>, Viktor Korzhikov-Vlakh <sup>1</sup>, Elena Katernyuk <sup>1,2</sup>, Natalia Zakharova <sup>2</sup>, Sergey Silonov <sup>1,4</sup>, Tatiana Tennikova <sup>1</sup> and Evgenia Korzhikova-Vlakh <sup>1,2,\*</sup>

- <sup>1</sup> Institute of Chemistry, Saint-Petersburg State University, Universitetsky Pr. 26, St. Petersburg 198504, Russia; polinadzhuzha@mail.ru (A.D.); v\_korzhikov@mail.ru (V.K.-V.); st068478@student.spbu.ru (E.K.); silonovsa25@yandex.ru (S.S.); tennikova@mail.ru (T.T.)
  - <sup>2</sup> Institute of Macromolecular Compounds, Russian Academy of Sciences, Bolshoy Pr. 31, St. Petersburg 199004, Russia; zakharova@gmail.com
  - <sup>3</sup> International Institute of Solution Chemistry and Advanced Materials Technologies, ITMO University, Lomonosov Street 9, St. Petersburg 191002, Russia; gandalipov@scamt-itmo.ru
  - <sup>4</sup> Institute of Cytology, Russian Academy of Sciences, Tikhorezky Pr. 4, St. Petersburg 194064, Russia
- \* Correspondence: vlakh@hq.macro.ru
- \* Correspondence: [vlakh@hq.macro.ru](mailto:vlakh@hq.macro.ru)

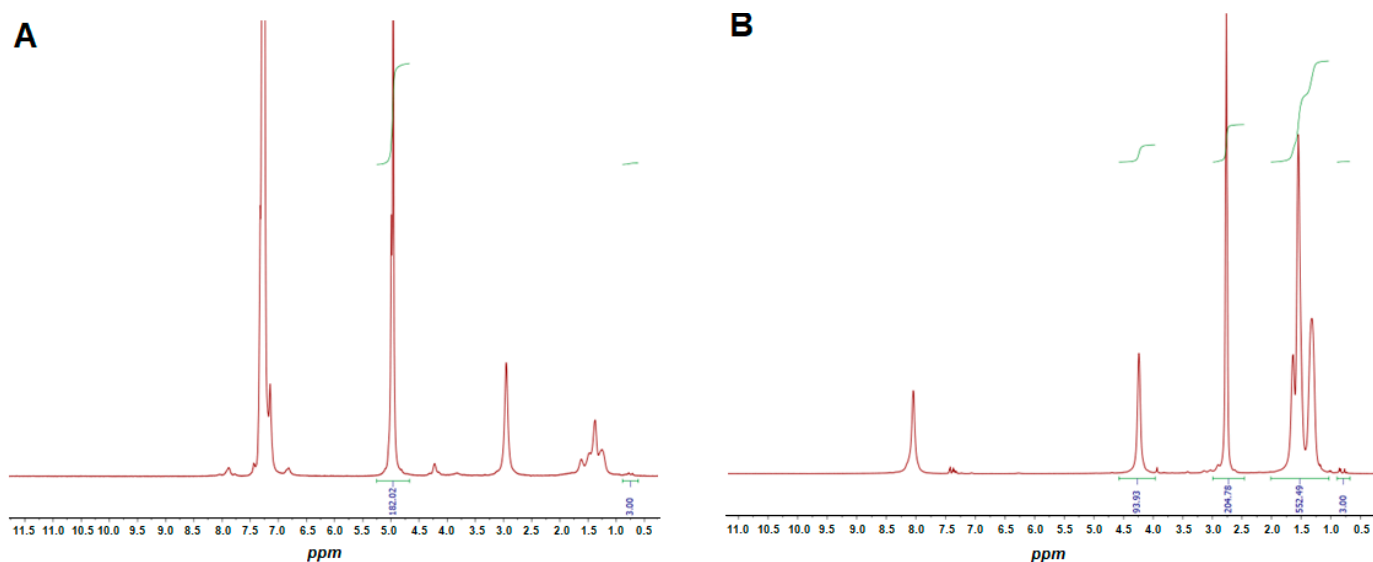

**Figure S1.** <sup>1</sup>H NMR spectra of P[K(Z)] (A) and P[K] (B) (DMSO-d<sub>6</sub> for (A) and D<sub>2</sub>O for (B), 25 °C). In spectra: ( $\delta$  ppm): 0.83 ( $\text{CH}_3$ , hexylamine), 1.0-2.0 ( $3\text{CH}_2$ , Lys), 2.5-3.0 ( $\text{CH}_2$ , Lys), 4.0-4.4 ( $\text{CH}$ , Lys); 4.7-5.2 ( $-\text{CH}_2-\text{C}_6\text{H}_5$ , Z-group) (A). The degree of polymerization (DP) is 91. Z-group signals are completely absent from the B spectrum, indicating complete deprotection.

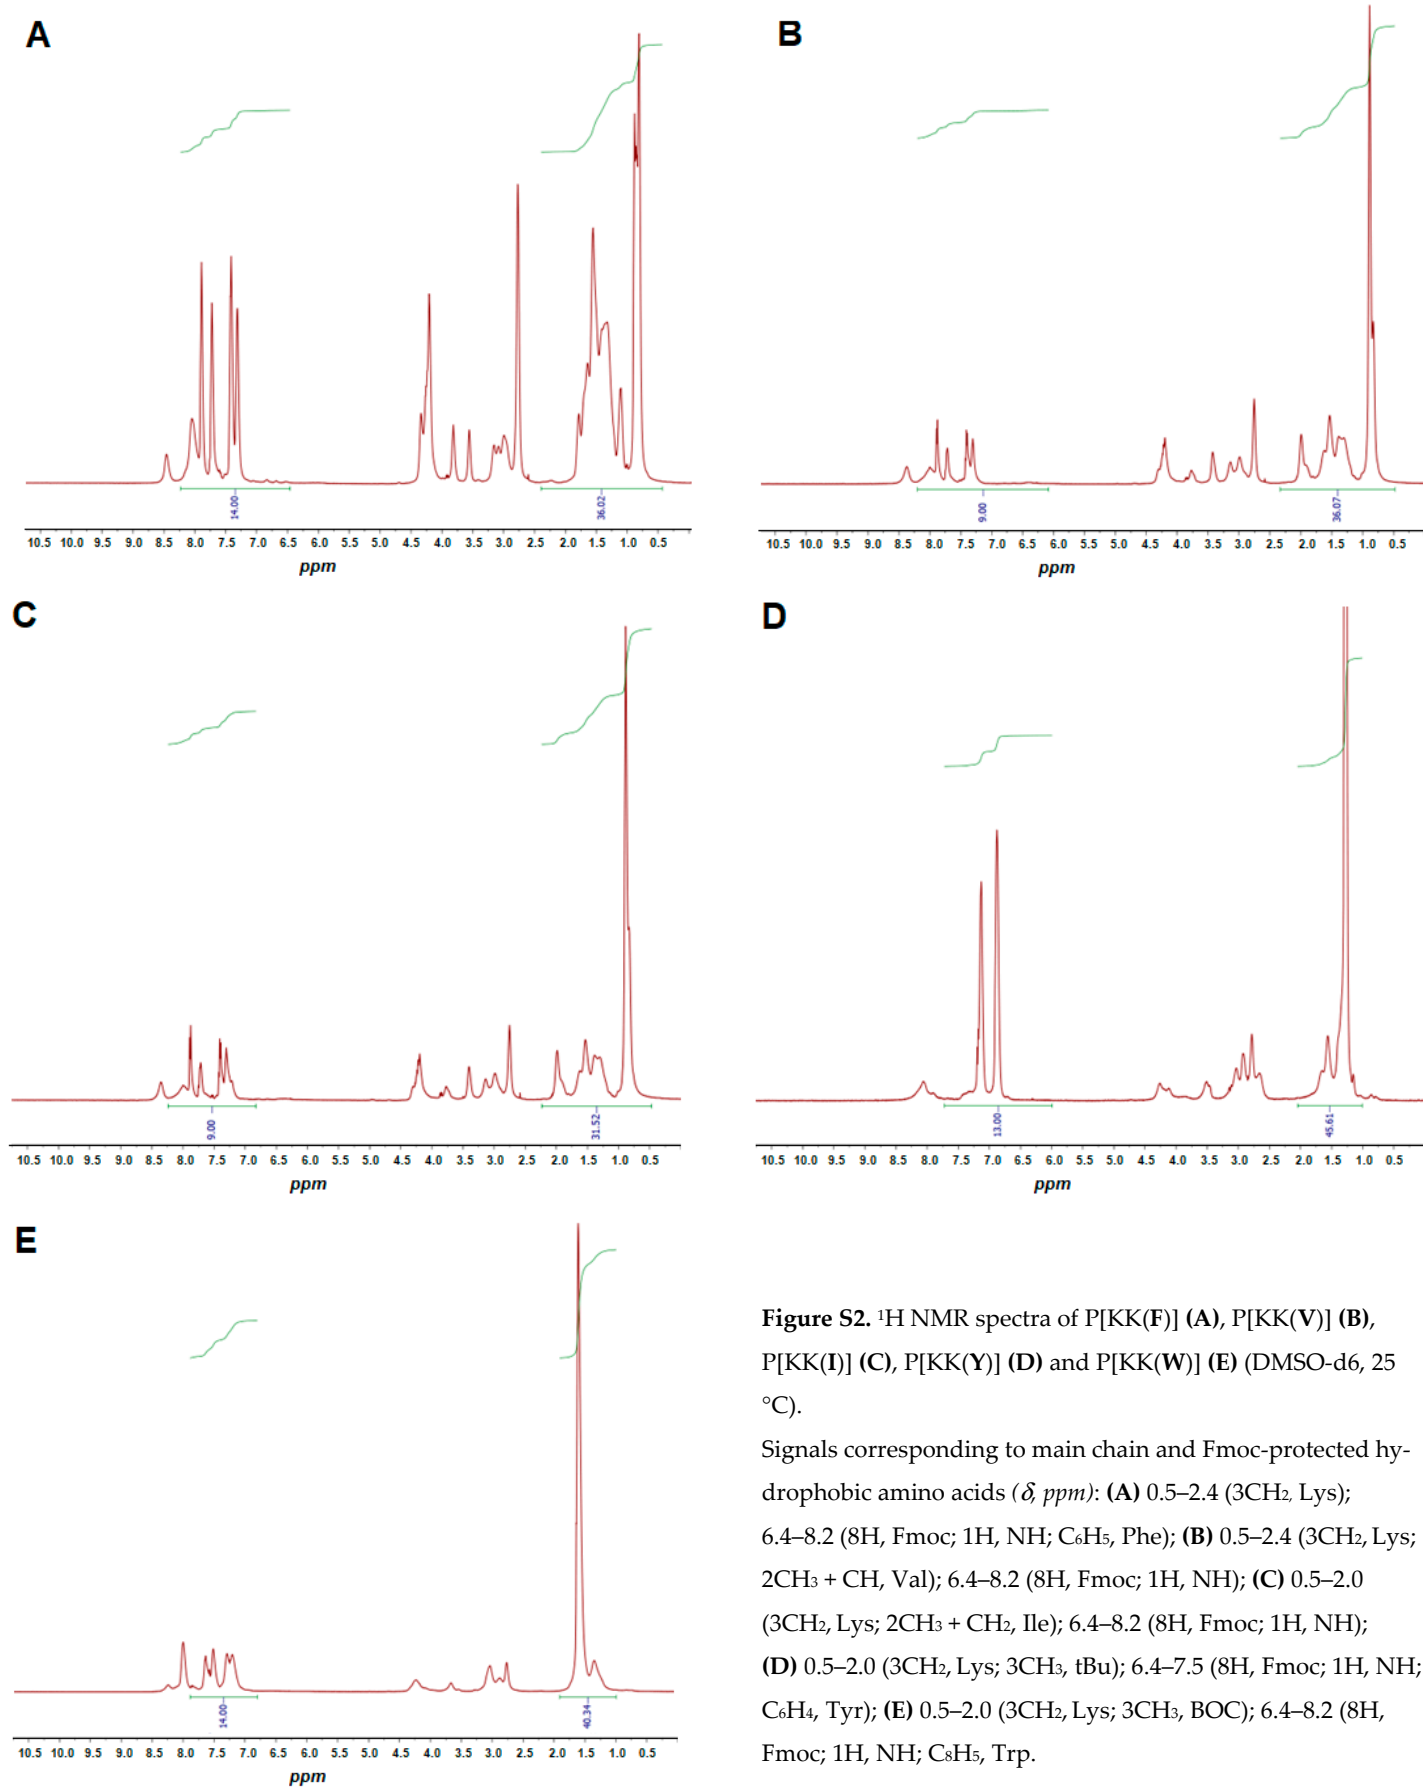

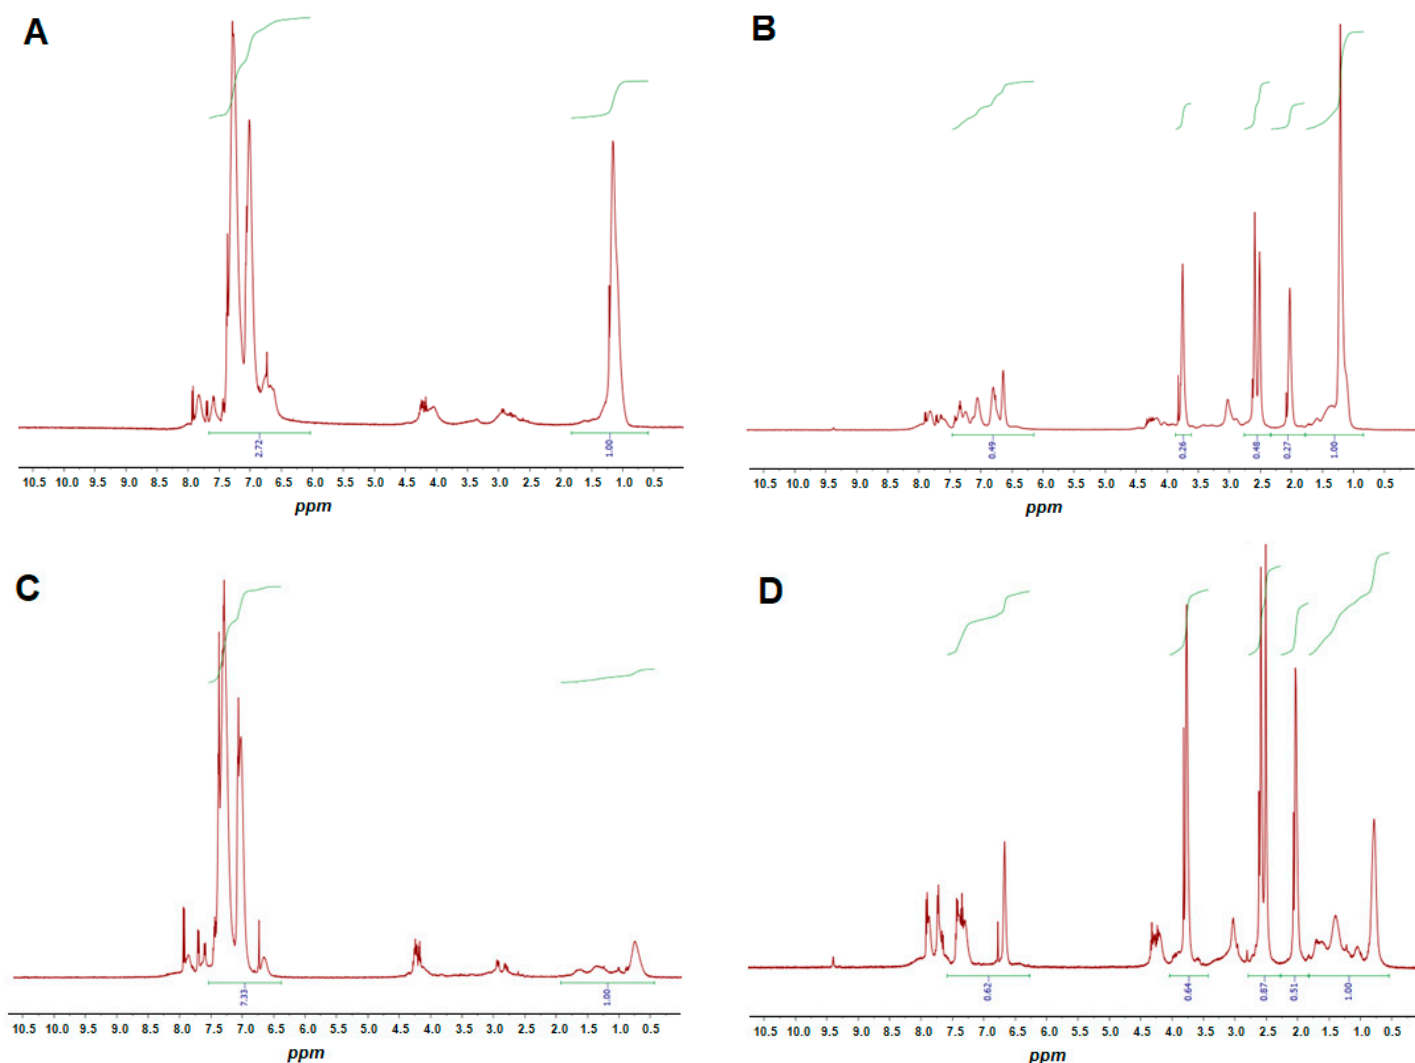

**Figure S3.**  $^1\text{H}$  NMR spectra of P[KK(Y)K(H)] (A), P[KK(Y)K(R)] (B), P[KK(I)K(H)] (C), P[KK(I)K(R)] (D) (DMSO- $d_6$ , 25 °C). Signals corresponding to main chain and protected amino acids in the side chain ( $\delta$ , ppm): (A) 0.5–2.0 (3CH<sub>2</sub>, Lys; 3CH<sub>3</sub>, tBu); 6.4–7.5 (8H, Fmoc; 1H, NH; C<sub>6</sub>H<sub>4</sub>, Tyr; 3C<sub>6</sub>H<sub>5</sub>, Trt; 2H, His); (B) 0.5–1.8 (3CH<sub>2</sub>, Lys; 3CH<sub>3</sub>, tBu; 2CH<sub>2</sub>, Arg); 1.8–2.3 (CH<sub>2</sub>, Arg); 2.4–2.7 (3CH<sub>3</sub>, Mtr); 3.5–3.9 (CH<sub>3</sub>-O, Mtr); 6.4–7.5 (8H, Fmoc; 1H, NH; C<sub>6</sub>H<sub>4</sub>, Tyr; H-Ar, Arg); (C) 0.5–2.0 (3CH<sub>2</sub>, Lys; 2CH<sub>3</sub> + CH<sub>2</sub>, Ile); 6.4–8.2 (8H, Fmoc; 1H, NH; 3C<sub>6</sub>H<sub>5</sub>, Trt; 2H, His); (D) 0.5–1.8 (3CH<sub>2</sub>, Lys; 2CH<sub>3</sub> + CH<sub>2</sub>, Ile; 2CH<sub>2</sub>, Arg); 1.8–2.3 (CH<sub>2</sub>, Arg); 2.4–2.7 (3CH<sub>3</sub>, Mtr); 3.5–4.0 (CH<sub>3</sub>-O, Mtr); 6.4–8.2 (8H, Fmoc; 1H, NH; H-Ar, Arg).

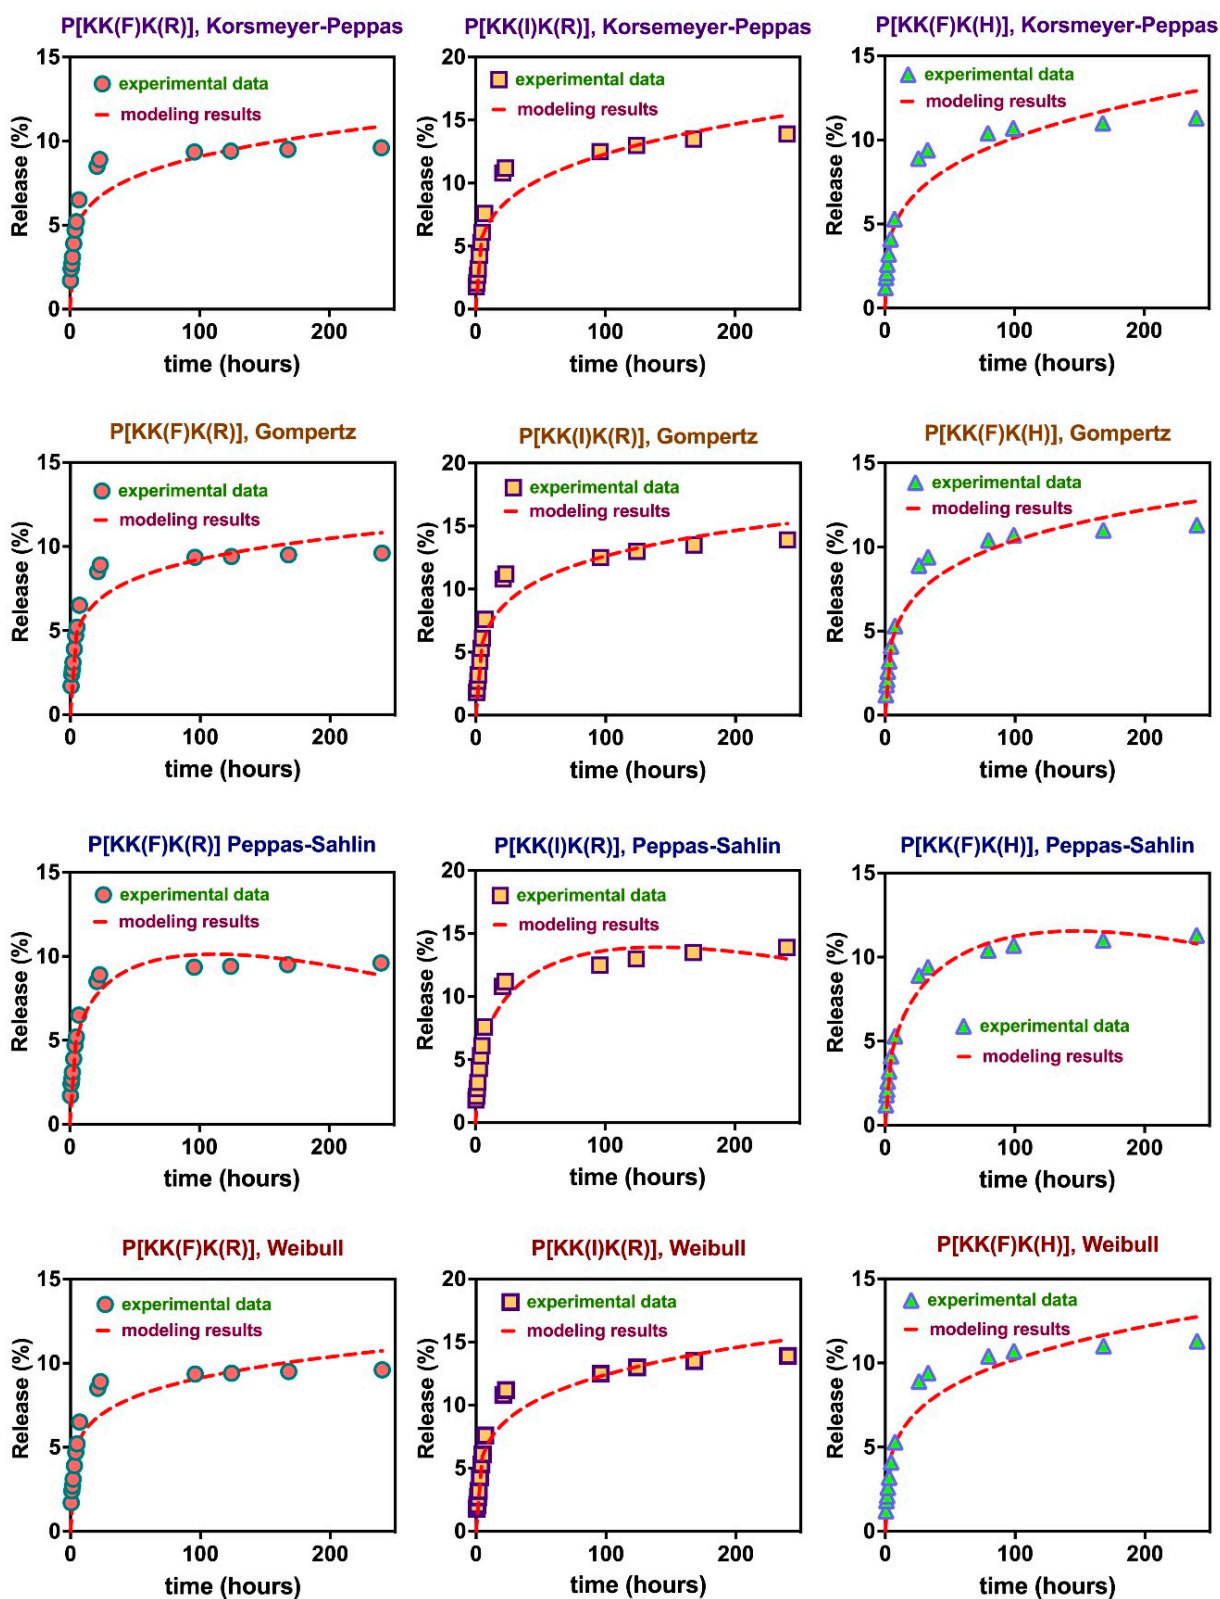

Figure S4. Best model fittings for PTX release from various polypeptide formulations under study.

**Table S1. Lipophilicity of some amino acids calculated from experimental results elsewhere.**

| Amino acid             | Lipophilicity     |                    |
|------------------------|-------------------|--------------------|
|                        | Parker et al. [1] | Chmelik et al. [2] |
| Tyrosine (Tyr, Y)      | 1.9               | 0.85               |
| Valine (Val, V)        | 3.7               | 1.07               |
| Isoleucine (Ile, I)    | 8.0               | 1.53               |
| Phenylalanine (Phe, F) | 9.2               | 1.91               |
| Tryptophan (Trp, W)    | 10.0              | 2.01               |

**References**

1. Parker, J.M.R.; Guo, D.; Hodges, R.S. New hydrophilicity scale derived from high-performance liquid chromatography peptide retention data: correlation of predicted surface residues with antigenicity and x-ray-derived accessible sites. *Biochemistry* **1986**, *25*, 5425–5432.
2. Chmelík, J.; Hudeček, J.; Putyera, K.; Makovička, J.; Kalous, V.; Chmelíková, J. Characterization of the hydrophobic properties of amino acids on the basis of their partition and distribution coefficients in the 1-octanol-water system. *Collect. Czechoslov. Chem. Commun.* **1991**, *56*, 2030–2041.

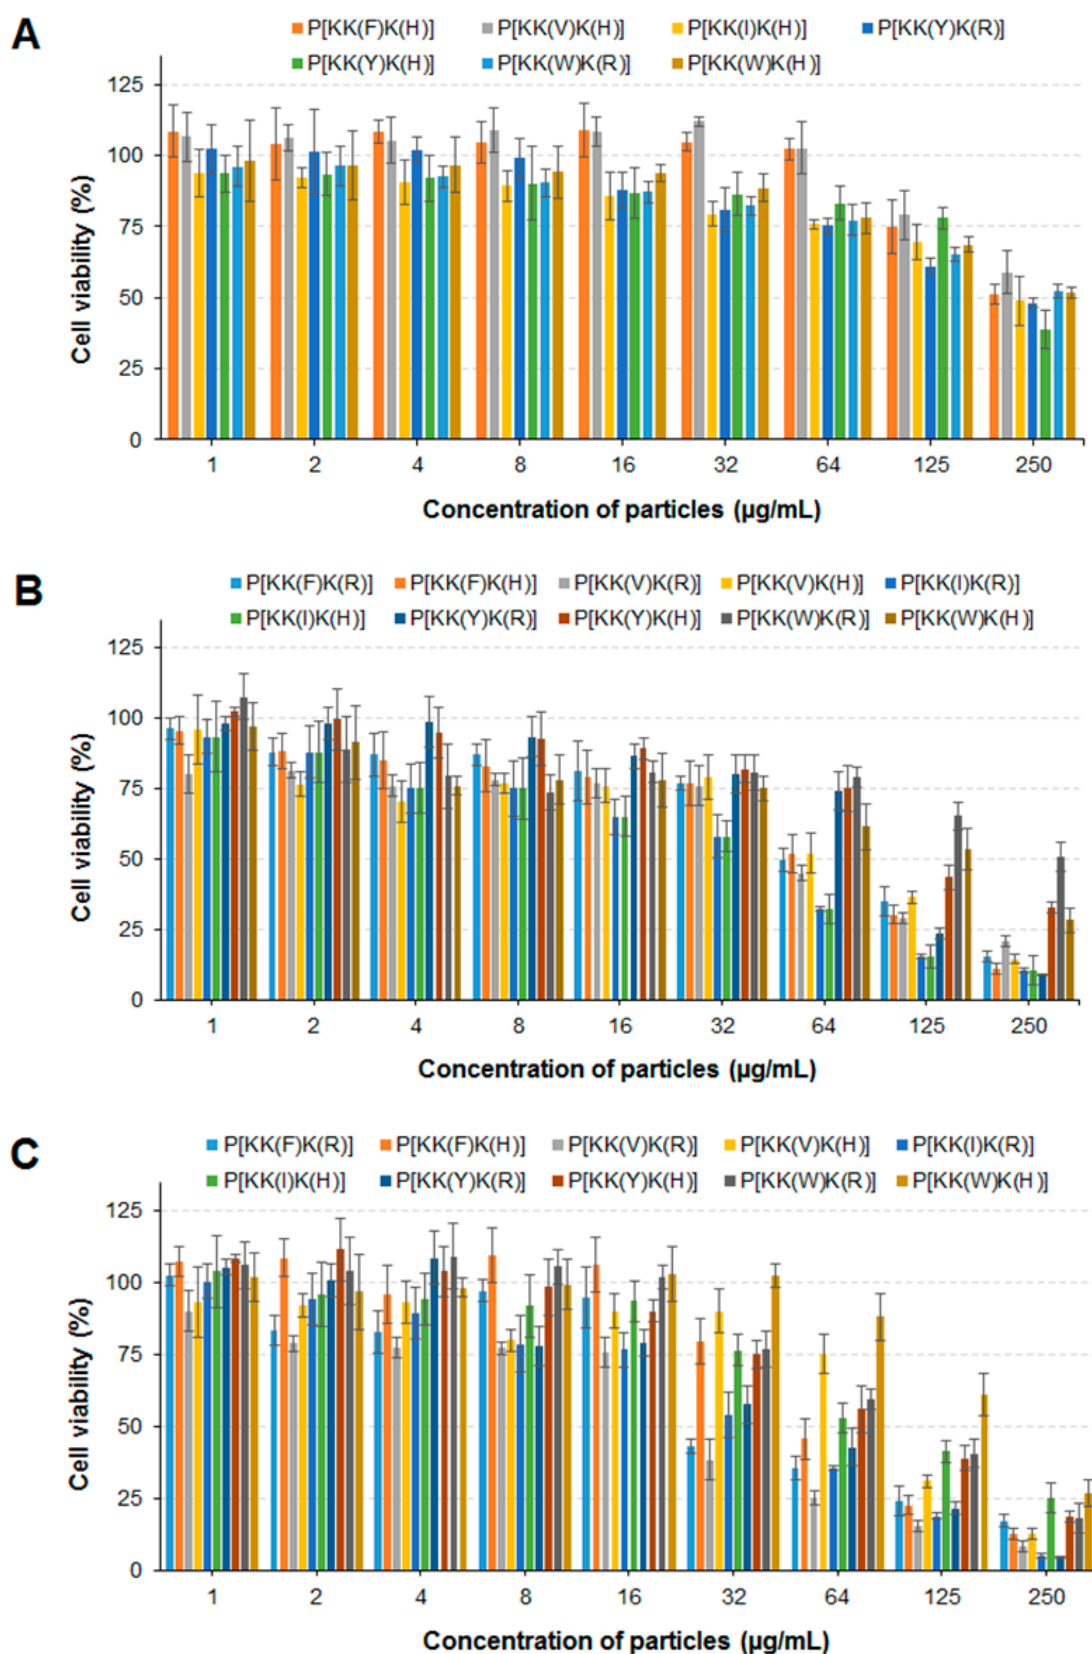

**Figure S5.** Cell viability assay of various polypeptide particles using normal and cancer cells (MTT, 72 h): A – HEK 293T, B – HeLa and C – A549 cell lines.

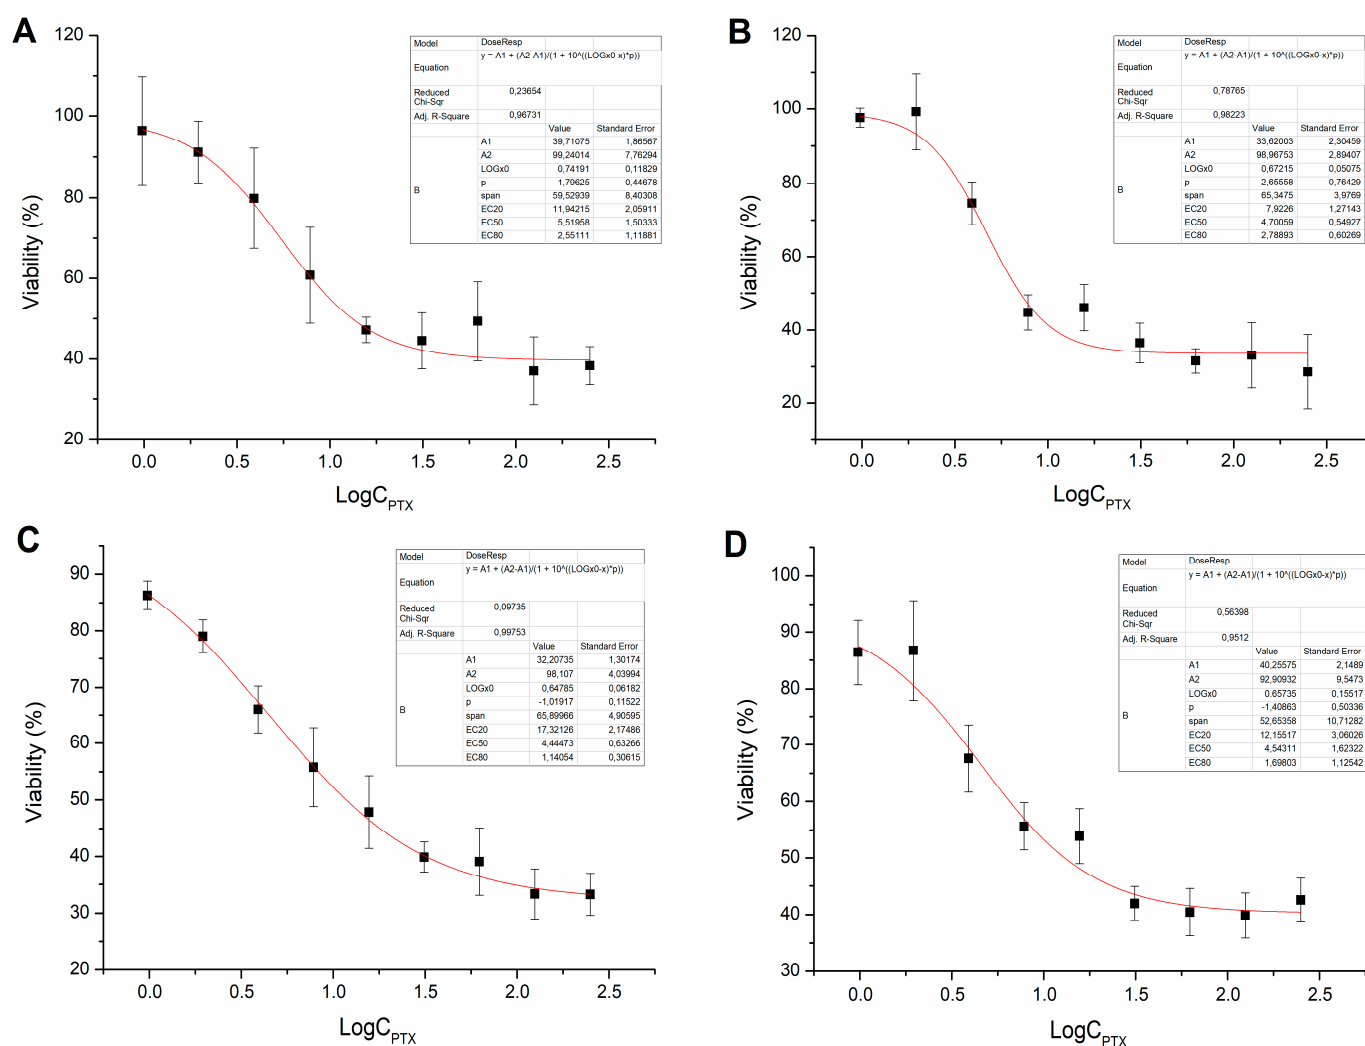

**Figure S6.** Dose-response curves for free PTX (**A**) and some its polypeptide formulations (**B-D**): P[KK(I)K(H)]@PTX (**B**), P[KK(Y)K(H)]@PTX (**C**) and P[KK(W)K(H)]@PTX (**D**).
